# Supplementary material
Source: PubMed Central journal article supplement (PMC2690502)

# Ezard, Cote & Pelletier: Eco-evolutionary dynamics: disentangling phenotypic, environmental and population fluctuations

## Electronic Supplementary Material 2: 3D Regression Planes

3-dimensional regression planes per population of a linear model that regressed change in population growth ( $\Delta$ mean fitness) against phenotypic and environmental change ( $\Delta$ phenotype and  $\Delta$ environment, respectively). The model with lowest value of the Akaike Information Criterion and therefore most support contained explanatory variables that described average trends in changes in population growth with environment, phenotype and their interaction (table 2). No statistically significant population-level variability was detected. Study population codes: SSSK: Soay sheep, BHRM: bighorn sheep at Ram Mountain, RDTF: roe deer; MGCR: mountain goats; BHSR: bighorn sheep at Sheep River.

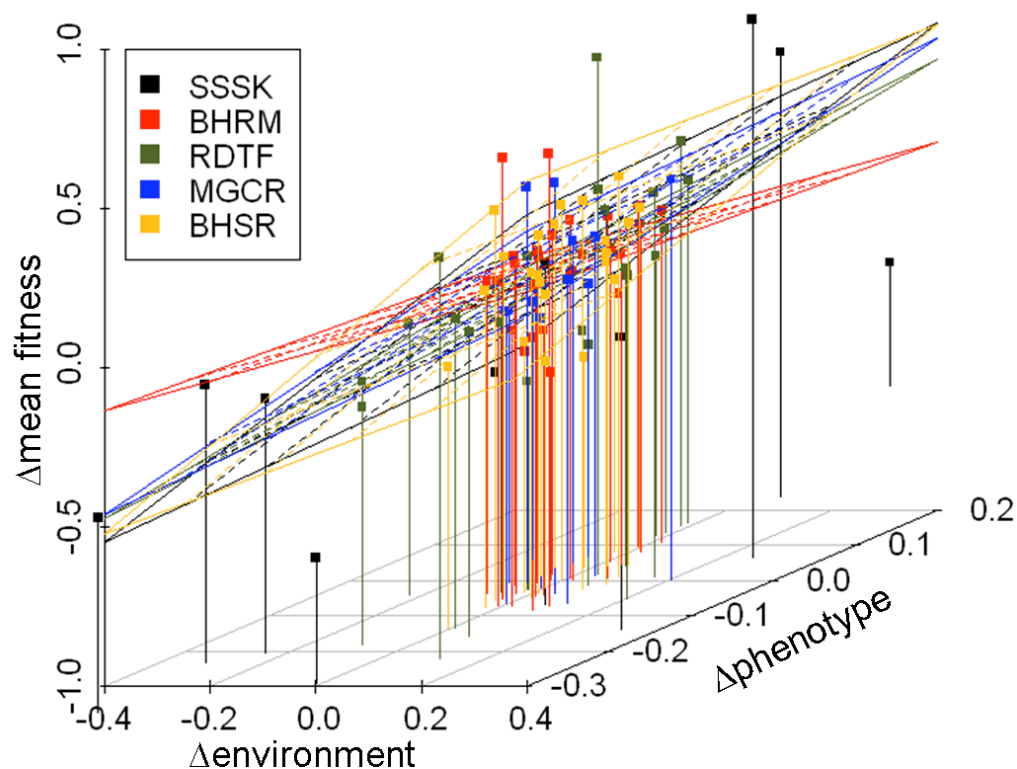

Supplement: rstb20090006s02.pdf [file rstb20090006s02.pdf]
